# Supplementary material for: Development of a questionnaire to evaluate patients’ awareness of cardiovascular disease risk in England’s National Health Service Health Check preventive cardiovascular programme
Source: PubMed Central journal article supplement (PMC5623403; doi:10.1136/bmjopen-2016-014413), 2017-09-25
Supplement: bmjopen-2016-014413supp001.pdf [file bmjopen-2016-014413supp001.pdf]

## Appendix A. 85 Item Questionnaire

| Subscale                                | Items                                                                                                                    | Answers                                                                                                                                                                                 |
|-----------------------------------------|--------------------------------------------------------------------------------------------------------------------------|-----------------------------------------------------------------------------------------------------------------------------------------------------------------------------------------|
| Knowledge of CVD Risk and Prevention    | 1. Eating a lot of red meat increases heart attack and stroke risk.                                                      | True, False, Don't Know<br>T=True F=False<br>Correct Answers<br>Q1=T Q2=F Q3=T<br>Q4=F Q5=T Q6=F<br>Q7=F Q8=T Q9=T<br>Q10=T Q11=F<br>Q12=T Q13=T<br>Q14=T Q15=T<br>Q16=F Q17=T<br>Q18=F |
|                                         | 2. Most people can tell whether or not they have high blood pressure.                                                    |                                                                                                                                                                                         |
|                                         | 3. You can reduce your risk of heart attack or stroke by being physically active.                                        |                                                                                                                                                                                         |
|                                         | 4. 'High' blood pressure is defined as 110/80 (systolic/diastolic) or higher.                                            |                                                                                                                                                                                         |
|                                         | 5. Dietary fibre lowers blood cholesterol.                                                                               |                                                                                                                                                                                         |
|                                         | 6. The most important cause of heart attack and stroke is stress.                                                        |                                                                                                                                                                                         |
|                                         | 7. Trans-fats are healthier for the heart than most other kinds of fats.                                                 |                                                                                                                                                                                         |
|                                         | 8. Walking and gardening are considered types of exercise that can lower the risk of having a heart attack or stroke.    |                                                                                                                                                                                         |
|                                         | 9. You can reduce your chance of developing a heart attack or stroke by eating five-a-day diet of fruits and vegetables. |                                                                                                                                                                                         |
|                                         | 10. Moderate physical activity of 150 minutes a week will reduce your chances of developing a heart attack or stroke.    |                                                                                                                                                                                         |
|                                         | 11. People who quit smoking by 60 add five years to their life.                                                          |                                                                                                                                                                                         |
|                                         | 12. People who have diabetes are at higher risk having a heart attack or stroke.                                         |                                                                                                                                                                                         |
|                                         | 13. Managing your stress levels will help you to manage your blood pressure.                                             |                                                                                                                                                                                         |
|                                         | 14. HDL refers to 'good' cholesterol, and LDL refers to 'bad' cholesterol.                                               |                                                                                                                                                                                         |
|                                         | 15. The healthiest exercise for the heart involves rapid breathing for a sustained period of time.                       |                                                                                                                                                                                         |
|                                         | 16. Many vegetables are high in cholesterol.                                                                             |                                                                                                                                                                                         |
|                                         | 17. You are more likely to have a heart attack or stroke if you're overweight or obese.                                  |                                                                                                                                                                                         |
|                                         | 18. Drinking alcohol has nothing to do with reducing the risk of heart attack or stroke.                                 |                                                                                                                                                                                         |
| Perceived Risk and Vulnerability of CVD | 19. There is a possibility that I will have a heart attack or stroke.                                                    | 1 = Strongly disagree; 2 = disagree; 3 = agree; 4 = strongly agree                                                                                                                      |
|                                         | 20. There is a good chance I will experience a heart attack or stroke during the next 10 years.                          |                                                                                                                                                                                         |
|                                         | 21. A person who gets a heart attack or stroke has no chance of recovering.                                              |                                                                                                                                                                                         |
|                                         | 22. I have a high chance of getting a heart attack or stroke because of my past behaviours.                              |                                                                                                                                                                                         |
|                                         | 23. I feel sure that I will have a heart attack or stroke.                                                               |                                                                                                                                                                                         |
|                                         | 24. Healthy lifestyle habits are unattainable.                                                                           |                                                                                                                                                                                         |
|                                         | 25. It is likely that I will get a heart attack or stroke.                                                               |                                                                                                                                                                                         |
|                                         | 26. I am at risk for having a heart attack or stroke.                                                                    |                                                                                                                                                                                         |
|                                         | 27. It is possible that I will have a heart attack or stroke.                                                            |                                                                                                                                                                                         |
|                                         | 28. I am not doing anything now that is unhealthy to my heart.                                                           |                                                                                                                                                                                         |
|                                         | 29. I am too young to have a heart attack or stroke.                                                                     |                                                                                                                                                                                         |
|                                         | 30. People like me do not get a heart attack or stroke.                                                                  |                                                                                                                                                                                         |
|                                         | 31. I am very healthy so I will not have a heart attack or stroke.                                                       |                                                                                                                                                                                         |
|                                         | 32. I am not worried that I might have a heart attack or stroke.                                                         |                                                                                                                                                                                         |
|                                         | 33. People my age are too young to have a heart attack or stroke.                                                        |                                                                                                                                                                                         |

|                          |                                                                                                                          |                                                                                          |
|--------------------------|--------------------------------------------------------------------------------------------------------------------------|------------------------------------------------------------------------------------------|
|                          | 34. People my age do not have a heart attack or stroke.                                                                  |                                                                                          |
|                          | 35. My lifestyle habits do not put me at risk for having a heart attack or stroke.                                       |                                                                                          |
|                          | 36. No matter what I do, if I am going to have a heart attack or stroke, I will have one.                                |                                                                                          |
|                          | 37. People who do not have a heart attack or stroke are just plain lucky.                                                |                                                                                          |
|                          | 38. The causes of a heart attack or stroke are unknown.                                                                  |                                                                                          |
| Perceived Susceptibility | 39. It is likely that I will suffer from a heart attack or stroke in the future.                                         |                                                                                          |
|                          | 40. My chances of suffering from a heart attack or stroke in the next few years are great.                               |                                                                                          |
|                          | 41. Having a heart attack or stroke is currently a possibility for me.                                                   |                                                                                          |
|                          | 42. I feel I will suffer from a heart attack or stroke sometime during my life.                                          |                                                                                          |
|                          | 43. I am concerned about the likelihood of having a heart attack or stroke in the near future.                           |                                                                                          |
| Perceived Severity       | 44. Heart attacks and strokes are always fatal.                                                                          |                                                                                          |
|                          | 45. Having a heart attack or stroke will threaten my relationship with my significant other.                             |                                                                                          |
|                          | 46. My whole life would change if I had a heart attack or stroke.                                                        |                                                                                          |
|                          | 47. Having a heart attack or stroke would have a very bad effect on my sex life.                                         |                                                                                          |
|                          | 48. If I have a heart attack or stroke I will die within 10 years.                                                       |                                                                                          |
| Perceived Benefits       | 49. Increasing my exercise will decrease my chances of having a heart attack or stroke.                                  |                                                                                          |
|                          | 50. Eating a healthy diet will decrease my chance of having a heart attack or stroke.                                    |                                                                                          |
|                          | 51. Stopping smoking will reduce my chance of having a heart attack or stroke.                                           |                                                                                          |
|                          | 52. When I exercise I am doing something good for myself.                                                                |                                                                                          |
|                          | 53. When I eat healthy I am doing something good for myself.                                                             |                                                                                          |
|                          | 54. Cutting down on alcohol will decrease my chances of having a heart attack or stroke.                                 |                                                                                          |
| Perceived Barriers       | 55. I do not know appropriate <u>exercises</u> to perform to reduce my risk of developing cardiovascular disease.        |                                                                                          |
|                          | 56. I do not know the recommended drinking limits for men or women.                                                      |                                                                                          |
|                          | 57. I do not have time to <u>exercise</u> for 30 minutes a day on most days of the week.                                 |                                                                                          |
|                          | 58. I do not know what is considered a <u>healthy diet</u> that would prevent me from developing cardiovascular disease. |                                                                                          |
|                          | 59. I will not have energy if I stop smoking.                                                                            |                                                                                          |
|                          | 60. I cannot afford to <u>buy healthy foods</u> .                                                                        |                                                                                          |
|                          | 61. I have other problems more important than worrying about diet and exercise.                                          |                                                                                          |
| Self Efficacy            | 62. How confident are you that you know or can control the risks of having a heart attack or stroke?                     | 1= not at all confident, 2=somewhat confident, 3=moderately confident, 4=very confident, |
|                          | 63. How confident are you that you know or can maintain a healthy weight by exercising regularly?                        |                                                                                          |
|                          | 64. How confident are you that you know or can stop smoking if you want to?                                              |                                                                                          |
|                          | 65. How confident are you that you know or can consume less alcohol?                                                     |                                                                                          |

|                                                                                                      |                                                                                                                                             |                                                                    |
|------------------------------------------------------------------------------------------------------|---------------------------------------------------------------------------------------------------------------------------------------------|--------------------------------------------------------------------|
|                                                                                                      | 66. How confident are you that you know or can control your blood pressure and/or cholesterol levels by taking your prescribed medications? | 5=completely confident                                             |
|                                                                                                      | 67. How confident are you that you know or can eat a healthy and balanced diet?                                                             |                                                                    |
| Intention to Change Behaviour or Cues to Action                                                      | 68. I want to stop smoking (if you do smoke).                                                                                               | 1 = Strongly disagree; 2 = disagree; 3 = agree; 4 = strongly agree |
|                                                                                                      | 69. I intend to maintain a healthy weight.                                                                                                  |                                                                    |
|                                                                                                      | 70. I intend to be physically active within two months.                                                                                     |                                                                    |
|                                                                                                      | 71. I expect to maintain a healthy weight.                                                                                                  |                                                                    |
|                                                                                                      | 72. I want to be physically active.                                                                                                         |                                                                    |
|                                                                                                      | 73. I intend to eat a healthy and balanced diet within two months.                                                                          |                                                                    |
|                                                                                                      | 74. I expect to stop smoking (if you do smoke).                                                                                             |                                                                    |
|                                                                                                      | 75. I want to cut down on alcohol.                                                                                                          |                                                                    |
|                                                                                                      | 76. I want to maintain a healthy and balanced diet.                                                                                         |                                                                    |
|                                                                                                      | 77. I intend to stop smoking within two months (if you do smoke).                                                                           |                                                                    |
|                                                                                                      | 78. I expect to eat a healthy and balanced diet.                                                                                            |                                                                    |
|                                                                                                      | 79. I intend to cut down on alcohol in the next two months.                                                                                 |                                                                    |
|                                                                                                      | 80. I expect to be physically active.                                                                                                       |                                                                    |
|                                                                                                      | 81. I expect to cut down on alcohol.                                                                                                        |                                                                    |
|                                                                                                      | 82. I want to eat a healthy and balanced diet.                                                                                              |                                                                    |
|                                                                                                      | 83. I expect to take my medication to control my blood pressure and/or cholesterol                                                          |                                                                    |
| 84. I want to take my medication to control my blood pressure and/or cholesterol                     |                                                                                                                                             |                                                                    |
| 85. I intend to take my medication to control my blood pressure and/or cholesterol within two months |                                                                                                                                             |                                                                    |

## Appendix B. 65 Item Questionnaire

| Scale                                                                                           | Subscale                                                                             | Items                                                                                                                                | Coding of Answers                                                                                                                                                                                               |
|-------------------------------------------------------------------------------------------------|--------------------------------------------------------------------------------------|--------------------------------------------------------------------------------------------------------------------------------------|-----------------------------------------------------------------------------------------------------------------------------------------------------------------------------------------------------------------|
| <b>Knowledge</b><br><br>(15 items)<br><br>Higher sum score = more knowledge able / more correct | <b>CVD Risk Knowledge – Risk of having a heart attack / stroke</b><br><br>(15 items) | 1. Eating a lot of red meat increases heart attack and stroke risk.                                                                  | Correct Answers<br><br>Q1-T Q6-T Q11-F<br>Q2-F Q7-T Q12-T<br>Q3-T Q8-T Q13-T<br>Q4-T Q9-T Q14-T<br>Q5-T Q10-T Q15-F<br><br>T= True<br>F= False<br><br>Correct: Score = 1,<br>Incorrect or Don't Know Score = 0. |
|                                                                                                 |                                                                                      | 2. Most people can tell whether or not they have high blood pressure.                                                                |                                                                                                                                                                                                                 |
|                                                                                                 |                                                                                      | 3. You can reduce your risk of heart attack or stroke by being physically active.                                                    |                                                                                                                                                                                                                 |
|                                                                                                 |                                                                                      | 4. One of the main causes of heart attack and stroke is stress.                                                                      |                                                                                                                                                                                                                 |
|                                                                                                 |                                                                                      | 5. Walking and gardening are considered types of exercise that can lower the risk of having a heart attack or stroke.                |                                                                                                                                                                                                                 |
|                                                                                                 |                                                                                      | 6. You can reduce your chance of developing a heart attack or stroke by eating at least five portions of fruit and vegetables a day. |                                                                                                                                                                                                                 |
|                                                                                                 |                                                                                      | 7. Moderate intensity activity of 2 ½ hours a week will reduce your chances of developing a heart attack or stroke.                  |                                                                                                                                                                                                                 |
|                                                                                                 |                                                                                      | 8. People who have diabetes are at higher risk of having a heart attack or stroke.                                                   |                                                                                                                                                                                                                 |
|                                                                                                 |                                                                                      | 9. Managing your stress levels will help you to manage your blood pressure.                                                          |                                                                                                                                                                                                                 |
|                                                                                                 |                                                                                      | 10. The healthiest exercise for the heart involves rapid breathing for 10 minutes or more.                                           |                                                                                                                                                                                                                 |
|                                                                                                 |                                                                                      | 11. Many vegetables are high in cholesterol.                                                                                         |                                                                                                                                                                                                                 |
|                                                                                                 |                                                                                      | 12. You are more likely to have a heart attack or stroke if you're overweight or obese.                                              |                                                                                                                                                                                                                 |
|                                                                                                 |                                                                                      | 13. Drinking high levels of alcohol can increase your cholesterol and triglyceride levels.                                           |                                                                                                                                                                                                                 |
|                                                                                                 |                                                                                      | 14. HDL refers to 'good' cholesterol, and LDL refers to 'bad' cholesterol.                                                           |                                                                                                                                                                                                                 |
|                                                                                                 |                                                                                      | 15. Family history of heart disease is not a risk                                                                                    |                                                                                                                                                                                                                 |

|                                                                                                                                                                                |                                          |                                                                                                     |                                                                                                                                                                                                                                                    |
|--------------------------------------------------------------------------------------------------------------------------------------------------------------------------------|------------------------------------------|-----------------------------------------------------------------------------------------------------|----------------------------------------------------------------------------------------------------------------------------------------------------------------------------------------------------------------------------------------------------|
|                                                                                                                                                                                |                                          | factor for high blood pressure.                                                                     |                                                                                                                                                                                                                                                    |
| <p><b>Perceived CVD Risk</b><br/>(15 items)</p> <p>Composite score = sum across subscales.<br/>Higher score = higher perception of risk of having a heart attack or stroke</p> | <p><b>Dread Risk</b><br/>(7 items)</p>   | 16. There is a possibility that I will have a heart attack or stroke.                               | <p>Higher sum score = Higher perceived lack of control, dread, catastrophic potential and fatal consequences</p> <p>1 = Strongly disagree; 2 = disagree; 3 = agree; 4 = strongly agree; N/A = 0</p>                                                |
|                                                                                                                                                                                |                                          | 17. There is a good chance I will experience a heart attack or stroke in the next 10 years.         |                                                                                                                                                                                                                                                    |
|                                                                                                                                                                                |                                          | 18. It is likely I will have a heart attack or stroke because of my past and/or present behaviours. |                                                                                                                                                                                                                                                    |
|                                                                                                                                                                                |                                          | 19. I feel sure that I will have a heart attack or stroke.                                          |                                                                                                                                                                                                                                                    |
|                                                                                                                                                                                |                                          | 20. It is likely that I will have a heart attack or stroke some time during my life.                |                                                                                                                                                                                                                                                    |
|                                                                                                                                                                                |                                          | 21. I am at risk for having a heart attack or stroke some time during my life.                      |                                                                                                                                                                                                                                                    |
|                                                                                                                                                                                |                                          | 22. It is possible that I will have a heart attack or stroke within the next 10 years.              |                                                                                                                                                                                                                                                    |
|                                                                                                                                                                                | <p><b>Risk</b><br/>(3 items)</p>         | 23. I am too young to have a heart attack or stroke.                                                | <p>Higher sum score = Higher perceived hazards that has few, moderate, known outcomes and consequences</p> <p><b>Reverse coded</b><br/>4 = Strongly disagree; 3 = disagree; 2 = agree; 1 = strongly agree; N/A = 0</p>                             |
|                                                                                                                                                                                |                                          | 24. People like me do not have a heart attack or stroke.                                            |                                                                                                                                                                                                                                                    |
|                                                                                                                                                                                |                                          | 25. I am not worried that I might have a heart attack or stroke.                                    |                                                                                                                                                                                                                                                    |
|                                                                                                                                                                                | <p><b>Unknown Risk</b><br/>(5 items)</p> | 26. I am not doing anything now that is unhealthy to my heart.                                      | <p>Higher sum score = Higher perceived hazards judged to be unobservable, unknown, new, and delayed in their manifestation of harm</p> <p><b>Reverse coded</b><br/>4 = Strongly disagree; 3 = disagree; 2 = agree; 1 = strongly agree; N/A = 0</p> |
|                                                                                                                                                                                |                                          | 27. I am very healthy so I will not have a heart attack or stroke.                                  |                                                                                                                                                                                                                                                    |
|                                                                                                                                                                                |                                          | 28. My lifestyle habits do not put me at risk for having a heart attack or stroke.                  |                                                                                                                                                                                                                                                    |
|                                                                                                                                                                                |                                          | 29. No matter what I do, if I am going to have a heart attack or stroke, I will have one.           |                                                                                                                                                                                                                                                    |
|                                                                                                                                                                                |                                          | 30. People who do not have a heart attack or stroke are just plain lucky.                           |                                                                                                                                                                                                                                                    |

|                                         |                                    |                                                                                                                              |                                                                                                                                                                                                                                                                           |
|-----------------------------------------|------------------------------------|------------------------------------------------------------------------------------------------------------------------------|---------------------------------------------------------------------------------------------------------------------------------------------------------------------------------------------------------------------------------------------------------------------------|
|                                         |                                    |                                                                                                                              |                                                                                                                                                                                                                                                                           |
| <b>CVD Health Beliefs</b><br>(13 items) | <b>Susceptibility</b><br>(4 items) | 31. It is likely that I will suffer from a heart attack or stroke in the future.                                             | Higher average score = Higher perceived personal risk of heart attack and stroke<br><br>1 = Strongly disagree; 2 = disagree; 3 = agree; 4 = strongly agree; N/A = 0                                                                                                       |
|                                         |                                    | 32. My chances of suffering from a heart attack or stroke in the next 10 years are great.                                    |                                                                                                                                                                                                                                                                           |
|                                         |                                    | 33. I feel I will suffer from a heart attack or stroke sometime during my life.                                              |                                                                                                                                                                                                                                                                           |
|                                         |                                    | 34. I am concerned about the likelihood of having a heart attack or stroke in the near future.                               |                                                                                                                                                                                                                                                                           |
|                                         | <b>Severity</b><br>(3 items)       | 35. Heart attacks and strokes are always fatal.                                                                              | Higher average score = Higher perceived severity of heart attack and stroke<br><br>1 = Strongly disagree; 2 = disagree; 3 = agree; 4 = strongly agree; N/A = 0                                                                                                            |
|                                         |                                    | 36. My whole life would change if I had a heart attack or stroke.                                                            |                                                                                                                                                                                                                                                                           |
|                                         |                                    | 37. If I have a heart attack or stroke I will die within 10 years.                                                           |                                                                                                                                                                                                                                                                           |
|                                         | <b>Benefits</b><br>(4 items)       | 38. Eating at least five portions of fruit and vegetables a day will decrease my chances of having a heart attack or stroke. | Higher average score = Higher perceived benefits of diet, exercise, consuming less alcohol and smoking cessation for reducing risk for heart attack and stroke<br><br><b>Reverse coded</b><br>4 = Strongly disagree; 3 = disagree; 2 = agree; 1 = strongly agree; N/A = 0 |
|                                         |                                    | 39. Increasing my exercise to at least 2 ½ hours a week will decrease my chances of having a heart attack or stroke.         |                                                                                                                                                                                                                                                                           |
|                                         |                                    | 40. When I exercise for at least 2 ½ hours a week I am doing something good for the health of my heart.                      |                                                                                                                                                                                                                                                                           |
|                                         |                                    | 41. When I eat at least five portions of fruit and vegetables a day I am doing something good for the health of my heart.    |                                                                                                                                                                                                                                                                           |
|                                         | <b>Barriers</b><br>(2 items)       | 42. I do not have time to exercise on most days of the week.                                                                 | Higher average score = Higher perception of select barriers to engaging in heart attack and stroke risk reducing behaviours<br><br>1 = Strongly disagree; 2 = disagree; 3 = agree; 4 = strongly agree; N/A = 0                                                            |
|                                         |                                    | 43. I cannot afford to buy healthy foods.                                                                                    |                                                                                                                                                                                                                                                                           |
| <b>Self</b>                             | <b>CVD risk</b>                    | How confident are you that you know how to or can...                                                                         | Higher average score = higher perceived                                                                                                                                                                                                                                   |

|                                                                            |                                       |                                                                                                  |                                                                                                                                                                                              |
|----------------------------------------------------------------------------|---------------------------------------|--------------------------------------------------------------------------------------------------|----------------------------------------------------------------------------------------------------------------------------------------------------------------------------------------------|
| <b>Efficacy</b><br><br>(5 items)                                           | <b>reduction</b>                      | 44. Control the risks of having a heart attack or stroke.                                        | confidence<br><br>1 = Not at all confident; 2 = somewhat confident; 3 = very confident; 4 = completely confident; N/A = 0                                                                    |
|                                                                            | <b>self efficacy</b><br><br>(5 items) | 45. Maintain a healthy weight by exercising at least 2½ hours a week within the next two months. |                                                                                                                                                                                              |
|                                                                            |                                       | 46. Stop smoking if you want to.                                                                 |                                                                                                                                                                                              |
|                                                                            |                                       | 47. Drink within the recommended levels of alcohol.                                              |                                                                                                                                                                                              |
|                                                                            |                                       | 48. Eat at least five portions of fruit and vegetables per day within the next two months.       |                                                                                                                                                                                              |
| <b>Intention /<br/><br/>Readiness<br/><br/>to Change</b><br><br>(17 items) | <b>Exercise</b><br><br>(4 items)      | 49. I am not thinking about exercising for 2 ½ hours a week.                                     | Higher average score = Higher perceived readiness for change with regard to exercise behaviour<br><br>1 = Strongly disagree; 2 = disagree; 3 = agree; 4 = strongly agree; N/A = 0            |
|                                                                            |                                       | 50. I am thinking about exercising at least 2 ½ hours a week.                                    |                                                                                                                                                                                              |
|                                                                            |                                       | 51. I intend or want to exercise at least 2 ½ hours a week.                                      |                                                                                                                                                                                              |
|                                                                            |                                       | 52. I am ready or have started to exercise 2 ½ hours a week.                                     |                                                                                                                                                                                              |
|                                                                            | <b>Diet</b><br><br>(4 items)          | 53. I am not thinking about eating at least five portions of fruit and vegetables a day.         | Higher average score = Higher perceived readiness for change with regard to health dietary behaviour<br><br>1 = Strongly disagree; 2 = disagree; 3 = agree; 4 = strongly agree; N/A = 0      |
|                                                                            |                                       | 54. I am thinking about eating at least five portions of fruit and vegetables a day.             |                                                                                                                                                                                              |
|                                                                            |                                       | 55. I intend or want to eat at least five portions of fruit and vegetables a day.                |                                                                                                                                                                                              |
|                                                                            |                                       | 56. I am ready or started to eat at least five portions of fruit and vegetables a day.           |                                                                                                                                                                                              |
|                                                                            | <b>Alcohol</b><br><br>(4 items)       | 57. I am thinking about cutting down on alcohol.                                                 | Higher average score = Higher perceived readiness for change with regard to alcohol consumption behaviour<br><br>1 = Strongly disagree; 2 = disagree; 3 = agree; 4 = strongly agree; N/A = 0 |
|                                                                            |                                       | 58. I intend or want to cut down on alcohol.                                                     |                                                                                                                                                                                              |
|                                                                            |                                       | 59. I have been cutting down on alcohol.                                                         |                                                                                                                                                                                              |
|                                                                            |                                       | 60. I am not thinking about cutting down on alcohol.                                             |                                                                                                                                                                                              |
|                                                                            | <b>Smoking</b><br><br>(5 items)       | 61. I am thinking of stopping smoking within two months.                                         | Higher average score = Higher perceived readiness for change with regard to smoking cessation                                                                                                |

|  |  |                                                                                        |                                                                                                       |
|--|--|----------------------------------------------------------------------------------------|-------------------------------------------------------------------------------------------------------|
|  |  | 62. I have reduced or stopped smoking.                                                 | behaviour<br><br>1 = Strongly disagree;<br>2 = disagree; 3 =<br>agree; 4 = strongly<br>agree; N/A = 0 |
|  |  | 63. I intend or want to stop smoking.                                                  |                                                                                                       |
|  |  | 64. If I stop smoking it will reduce my chances of<br>having a heart attack or stroke. |                                                                                                       |
|  |  | 65. I am not thinking about stopping smoking.                                          |                                                                                                       |



## Appendix C. Population characteristics of 110 NHS Health Check attendees

| Population Characteristics                        |                                             | n      | % Total          |
|---------------------------------------------------|---------------------------------------------|--------|------------------|
| <i>Gender</i>                                     | Male                                        | 51     | 46.4%            |
|                                                   | Female                                      | 56     | 50.9%            |
| <i>Age group</i>                                  | 40-49                                       | 45     | 40.9%            |
|                                                   | 50-59                                       | 40     | 36.4%            |
|                                                   | 60-74                                       | 14     | 12.7%            |
| <i>Ethnicity</i>                                  | White                                       | 93     | 84.5%            |
|                                                   | Mixed                                       | 2      | 1.8%             |
|                                                   | Asian                                       | 2      | 1.8%             |
|                                                   | Black                                       | 4      | 3.6%             |
|                                                   | Other                                       | 4      | 3.6%             |
| <i>Deprivation*</i>                               | IMD 1 - least deprived                      | 14     | 12.7%            |
|                                                   | IMD 2                                       | 30     | 27.3%            |
|                                                   | IMD 3                                       | 12     | 10.9%            |
|                                                   | IMD 4                                       | 31     | 28.2%            |
|                                                   | IMD 5 - most deprived                       | 14     | 12.7%            |
| <i>Cholesterol</i>                                | Raised total cholesterol TC $\geq$ 5 mmol/l | 66     | 60.0%            |
| <i>Blood pressure</i>                             | High blood pressure BP $\geq$ 140/90 mm Hg  | 28     | 25.5%            |
| <i>Body Mass Index (BMI)</i>                      | Obese (BMI $\geq$ 30)                       | 26     | 23.6%            |
| <i>Physical activity</i>                          | Physically inactive                         | 22     | 20.0%            |
| <i>Smoking status</i>                             | Smokers                                     | 20     | 18.2%            |
| <i>Alcohol consumption</i>                        | Excessive drinkers                          | 13     | 11.8%            |
| <i>10 year predicted risk of CVD**</i>            | High CVD Risk (QRisk2 $\geq$ 20%)           | 5      | 4.5%             |
|                                                   | Medium CVD Risk (10% $\leq$ QRisk2 $<$ 20%) | 21     | 19.1%            |
|                                                   | Low CVD Risk (QRisk2 $<$ 10%)               | 85     | 77.3%            |
| <i>Mean Values &amp; 95% Confidence Intervals</i> | Age (95% CI)                                | 51.52  | (49.93, 53.12)   |
|                                                   | Total Cholesterol (95% CI)                  | 5.42   | (5.19, 5.64)     |
|                                                   | HDL Cholesterol (95% CI)                    | 1.44   | (1.36, 1.53)     |
|                                                   | Cholesterol Ratio (TC/HDL) (95% CI)         | 4.12   | (3.73, 4.52)     |
|                                                   | SBP (95% CI)                                | 129.60 | (125.76, 133.44) |
|                                                   | DBP (95% CI)                                | 81.63  | (79.62, 83.63)   |
|                                                   | BMI (95% CI)                                | 27.24  | (26.17, 28.31)   |
|                                                   | Q-Risk 2 (95% CI)                           | 6.27   | (5.19, 7.34)     |

\*Deprivation was measured using the Index of Multiple Deprivation (IMD).

\*\*Ten year predicted risk of CVD was estimated using the Q-Risk 2 algorithm<sup>1</sup>

Notes: SBP = systolic blood pressure; DBP = diastolic blood pressure; CI = confidence interval; HDL = high density lipoprotein; CVD = cardiovascular disease

### References

1. Hippisley-Cox J, Coupland C, Vinogradova Y, et al. Predicting cardiovascular risk in England and Wales: prospective derivation and validation of QRISK2. *BMJ*. 2008; 336.

**Appendix D. The ABCD Risk Questionnaire  and scoring guide**

| Scale                                                                                                                                                                      | Items                                                                                                                                                                                                                                                                                                                                                                                                                                                                                                                                                                                                                                                                                                                                                                                                                                        | Coding                                                                                                                                                                                                                                                                                                                                                                                                               |
|----------------------------------------------------------------------------------------------------------------------------------------------------------------------------|----------------------------------------------------------------------------------------------------------------------------------------------------------------------------------------------------------------------------------------------------------------------------------------------------------------------------------------------------------------------------------------------------------------------------------------------------------------------------------------------------------------------------------------------------------------------------------------------------------------------------------------------------------------------------------------------------------------------------------------------------------------------------------------------------------------------------------------------|----------------------------------------------------------------------------------------------------------------------------------------------------------------------------------------------------------------------------------------------------------------------------------------------------------------------------------------------------------------------------------------------------------------------|
| <p><b>Knowledge</b></p> <p>Higher sum score = more knowledgeable / more correct about having a heart attack or stroke</p>                                                  | <ol style="list-style-type: none"> <li>1. One of the main causes of heart attack and stroke is stress.</li> <li>2. Walking and gardening are considered types of exercise that can lower the risk of having a heart attack or stroke.</li> <li>3. Moderately intense activity of 2 ½ hours a week will reduce your chances of having a heart attack or stroke.</li> <li>4. People who have diabetes are at higher risk of having a heart attack or stroke.</li> <li>5. Managing your stress levels will help you to manage your blood pressure.</li> <li>6. Drinking high levels of alcohol can increase your cholesterol and triglyceride levels.</li> <li>7. HDL refers to ‘good’ cholesterol, and LDL refers to ‘bad’ cholesterol.</li> <li>8. A family history of heart disease is not a risk factor for high blood pressure.</li> </ol> | <p>Correct Answers:</p> <p>Q1-T<br/>Q2-T<br/>Q3-T<br/>Q4-T<br/>Q5-T<br/>Q6-T<br/>Q7-T<br/>Q8-F</p> <p>T= True<br/>F= False</p> <p>Correct: Score = 1,<br/>Incorrect or Don’t Know: Score = 0.</p>                                                                                                                                                                                                                    |
| <p><b>Perceived Risk of Heart Attack/Stroke</b></p> <p>Higher sum score = higher perception of risk of having a heart attack or stroke</p> <p><b>Perceived Risk of</b></p> | <ol style="list-style-type: none"> <li>9. I feel I will suffer from a heart attack or stroke sometime during my life.</li> <li>10. It is likely that I will suffer from a heart attack or stroke in the future.</li> <li>11. It is likely that I will have a heart attack or stroke some time during my life.</li> <li>12. There is a good chance I will experience a heart attack or stroke in the next 10 years.</li> <li>13. My chances of suffering from a heart attack or stroke in the next 10 years are great.</li> <li>14. It is likely I will have a heart attack or stroke because of my past and/or present behaviours.</li> </ol>                                                                                                                                                                                                | <p>1=Strongly disagree; 2 = disagree; 3 = agree; 4 = strongly agree; N/A = 0</p> <p>1=Strongly disagree; 2 = disagree; 3 = agree; 4 = strongly agree; N/A = 0</p> <p>1=Strongly disagree; 2 = disagree; 3 = agree; 4 = strongly agree; N/A = 0</p> <p>1=Strongly disagree; 2 = disagree; 3 = agree; 4 = strongly agree; N/A = 0</p> <p>1=Strongly disagree; 2 = disagree; 3 = agree; 4 = strongly agree; N/A = 0</p> |

| Scale                                                                                                                                                                                                      | Items                                                                                                                      | Coding                                                                                            |
|------------------------------------------------------------------------------------------------------------------------------------------------------------------------------------------------------------|----------------------------------------------------------------------------------------------------------------------------|---------------------------------------------------------------------------------------------------|
| <b>Heart Attack/Stroke</b>                                                                                                                                                                                 | 15. I am not worried that I might have a heart attack or stroke.                                                           | <b>Reverse coded</b><br>4=Strongly disagree; 3 = disagree; 2 = agree; 1 = strongly agree; N/A = 0 |
|                                                                                                                                                                                                            | 16. I am concerned about the likelihood of having a heart attack or stroke in the near future.                             | 1=Strongly disagree; 2 = disagree; 3 = agree; 4 = strongly agree; N/A = 0                         |
| <b>Perceived Benefits and Intentions to Change</b><br><br>Higher average score = Higher perceived benefits of diet and exercise and higher perceived readiness for change in regards to exercise behaviour | 17. I am thinking about exercising at least 2½ hours a week.                                                               | 1=Strongly disagree; 2 = disagree; 3 = agree; 4 = strongly agree; N/A = 0                         |
|                                                                                                                                                                                                            | 18. I intend or want to exercise at least 2½ hours a week.                                                                 | 1=Strongly disagree; 2 = disagree; 3 = agree; 4 = strongly agree; N/A = 0                         |
|                                                                                                                                                                                                            | 19. When I exercise for at least 2½ hours a week I am doing something good for the health of my heart.                     | 1=Strongly disagree; 2 = disagree; 3 = agree; 4 = strongly agree; N/A = 0                         |
|                                                                                                                                                                                                            | 20. I am confident that I can maintain a healthy weight by exercising at least 2½ hours a week within the next two months. | 1=Strongly disagree; 2 = disagree; 3 = agree; 4 = strongly agree; N/A = 0                         |
|                                                                                                                                                                                                            | 21. I am not thinking about exercising for 2 ½ hours a week.                                                               | <b>Reverse coded</b><br>4=Strongly disagree; 3 = disagree; 2 = agree; 1 = strongly agree; N/A = 0 |
|                                                                                                                                                                                                            | 22. When I eat at least five portions of fruit and vegetables a day I am doing something good for the health of my heart.  | 1=Strongly disagree; 2 = disagree; 3 = agree; 4 = strongly agree; N/A = 0                         |
|                                                                                                                                                                                                            | 23. Increasing my exercise to at least 2½ hours a week will decrease my chances of having a heart attack or stroke.        | 1=Strongly disagree; 2 = disagree; 3 = agree; 4 = strongly agree; N/A = 0                         |
| <b>Healthy Eating Intentions</b><br><br>Higher average score = Higher perceived readiness for change with regard to health dietary behaviour                                                               | 24. I am confident that I can eat at least five portions of fruit and vegetables per day within the next two months.       | 1=Strongly disagree; 2 = disagree; 3 = agree; 4 = strongly agree; N/A = 0                         |
|                                                                                                                                                                                                            | 25. I am thinking about eating at least five portions of fruit and vegetables a day.                                       | 1=Strongly disagree; 2 = disagree; 3 = agree; 4 = strongly agree; N/A = 0                         |
|                                                                                                                                                                                                            | 26. I am not thinking about eating at least five portions of fruit and vegetables a day.                                   | <b>Reverse coded</b><br>4=Strongly disagree; 3 = disagree; 2 = agree; 1 = strongly agree; N/A = 0 |

 The Attitudes and Beliefs about Cardiovascular Disease (ABCD) Risk Questionnaire is licensed under the [Creative Commons Attribution 4.0 International License](https://creativecommons.org/licenses/by/4.0/).

**Appendix E. Correlations of Factors of the ABCD Risk Questionnaire with Predicted CVD Risk using Spearman's Rho among 110 NHS Health Check Attendees**

|                    |                         | KNOWLEDGE | PERCEIVED RISK | PERCEIVED BENEFITS | HEALTHY INTENTIONS | IMD2010_Q uintile | BMI    | QRISK2 | QRISK2_L_M_H |
|--------------------|-------------------------|-----------|----------------|--------------------|--------------------|-------------------|--------|--------|--------------|
| KNOWLEDGE          | Correlation Coefficient | 1.000     | -.124          | -.148              | -.106              | -.002             | -.225* | -.007  | -.063        |
|                    | Sig. (2-tailed)         | .         | .236           | .175               | .319               | .986              | .021   | .941   | .522         |
|                    | N                       | 107       | 93             | 86                 | 91                 | 99                | 105    | 104    | 104          |
| PERCEIVED RISK     | Correlation Coefficient | -.124     | 1.000          | -.195              | -.188              | .239*             | .389** | .220*  | .173         |
|                    | Sig. (2-tailed)         | .236      | .              | .080               | .088               | .025              | .000   | .036   | .102         |
|                    | N                       | 93        | 95             | 82                 | 84                 | 87                | 92     | 91     | 91           |
| PERCEIVED BENEFITS | Correlation Coefficient | -.148     | -.195          | 1.000              | .533**             | -.287**           | -.068  | -.118  | -.232*       |
|                    | Sig. (2-tailed)         | .175      | .080           | .                  | .000               | .009              | .538   | .284   | .033         |
|                    | N                       | 86        | 82             | 88                 | 83                 | 81                | 85     | 84     | 84           |
| HEALTHY INTENTIONS | Correlation Coefficient | -.106     | -.188          | .533**             | 1.000              | -.261*            | .084   | -.072  | -.116        |
|                    | Sig. (2-tailed)         | .319      | .088           | .000               | .                  | .016              | .430   | .504   | .279         |
|                    | N                       | 91        | 84             | 83                 | 93                 | 85                | 90     | 89     | 89           |

|                  |                         | KNOWLEDGE | PERCEIVED RISK | PERCEIVED BENEFITS | HEALTHY INTENTIONS | IMD2010_Quintile | BMI   | QRISK2 | QRISK2_L_M_H |
|------------------|-------------------------|-----------|----------------|--------------------|--------------------|------------------|-------|--------|--------------|
| IMD2010_Quintile | Correlation Coefficient | -.002     | .239*          | -.287**            | -.261*             | 1.000            | -.008 | .009   | .017         |
|                  | Sig. (2-tailed)         | .986      | .025           | .009               | .016               | .                | .938  | .931   | .870         |
|                  | N                       | 99        | 87             | 81                 | 85                 | 101              | 101   | 100    | 100          |
| BMI              | Correlation Coefficient | -.225*    | .389**         | -.068              | .084               | -.008            | 1.000 | .020   | .028         |
|                  | Sig. (2-tailed)         | .021      | .000           | .538               | .430               | .938             | .     | .839   | .777         |
|                  | N                       | 105       | 92             | 85                 | 90                 | 101              | 107   | 106    | 106          |
| QRISK2           | Correlation Coefficient | -.007     | .220*          | -.118              | -.072              | .009             | .020  | 1.000  | .694**       |
|                  | Sig. (2-tailed)         | .941      | .036           | .284               | .504               | .931             | .839  | .      | .000         |
|                  | N                       | 104       | 91             | 84                 | 89                 | 100              | 106   | 106    | 106          |
| QRISK2_L_M_H     | Correlation Coefficient | -.063     | .173           | -.232*             | -.116              | .017             | .028  | .694** | 1.000        |
|                  | Sig. (2-tailed)         | .522      | .102           | .033               | .279               | .870             | .777  | .000   | .            |
|                  | N                       | 104       | 91             | 84                 | 89                 | 100              | 106   | 106    | 106          |

\* Correlation is significant at the 0.05 level (2-tailed). \*\* Correlation is significant at the 0.01 level (2-tailed).

QRisk2\_L\_M\_H categorizes predicted CVD risk from Low CVD Risk (QRISK2<10%), to Medium CVD Risk (10%<=QRISK2<20%), to High CVD Risk (QRISK2>=20%).

IMD2010Quintile categorizes deprivation from 1=least deprived to 5=most deprived.
